# Supplementary material for: Design of noble metal free hierarchical VS2 onto WO3 nanoflakes as an effective heterojunction strategy for enhanced photoelectrochemical water oxidation
Source: Royal Society of Chemistry journal article supplement (doi:10.1039/c9se00719a), 2019-01-01
Supplement: c9se00719a1.pdf [file c9se00719a1.pdf]

Supplementary Information:

**Noble metal free hierarchical VS<sub>2</sub> onto WO<sub>3</sub> nanoflakes as an effective hetero junction strategy for enhanced photoelectrochemical water oxidation**

Ching Thian Moi,<sup>a</sup> Gaurangi Gogoi,<sup>a</sup> Tushar Kanta Sahu,<sup>a</sup> Devipriya Gogoi,<sup>b</sup> Nageswara Rao Peela<sup>b</sup> and Mohammad Qureshi<sup>\*a</sup>

<sup>a</sup>Department of Chemistry, Indian Institute of Technology, Guwahati – 781039, Assam, India.

\*E-mail: mq@iitg.ac.in; Fax: +91 361 2582349; Tel: +91 361 2582320

<sup>b</sup>Department of Chemical Engineering, Indian Institute of Technology, Guwahati – 781039, Assam, India.

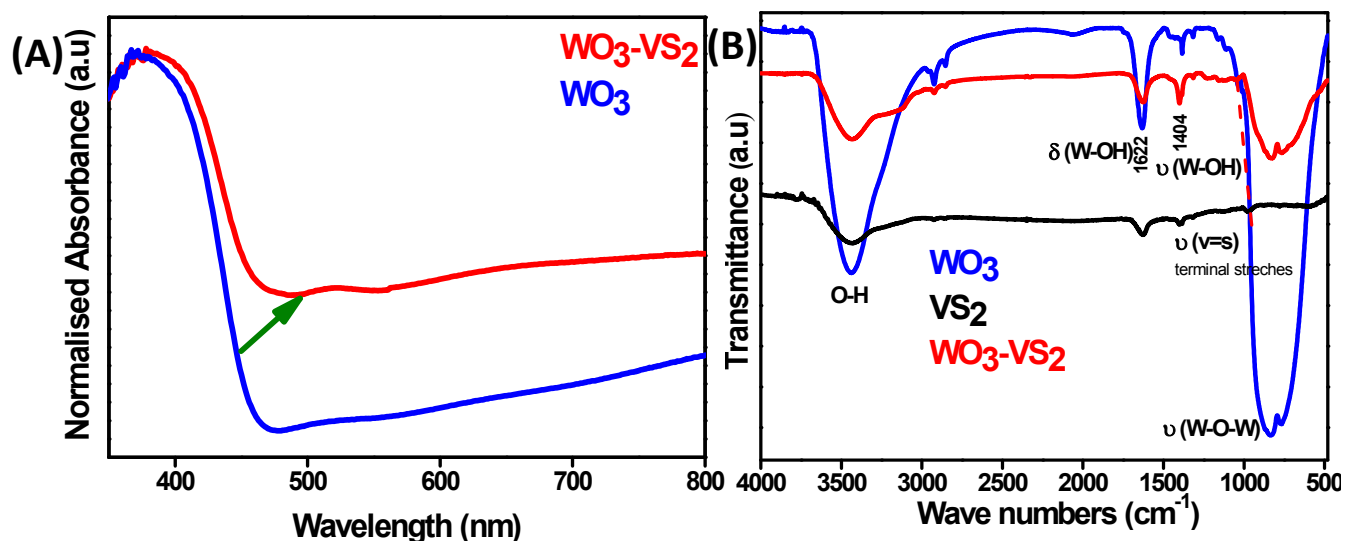

**Fig. S1** (A) UV-Vis absorption spectra and (B) Fourier transforms infrared (FTIR) spectra of WO<sub>3</sub>, VS<sub>2</sub> and WO<sub>3</sub>-VS<sub>2</sub> composites.

Fourier transforms infrared (FTIR) spectra was obtained to characterize the surface functional groups in Fig. S1 (B). Monoclinic WO<sub>3</sub> exhibited three distinct peaks at the

wavelengths of 1622, 1405, and 804  $\text{cm}^{-1}$ , which correspond to W-OH bending vibration mode as a result of adsorbed water molecules, W-O stretching vibration and O-W-O stretching mode respectively.<sup>1</sup> The broad absorption bands at 3450  $\text{cm}^{-1}$  was associated with weakly bound surface hydroxyl from ethanol/water.  $\text{VS}_2$  shows characteristic band centered at 986  $\text{cm}^{-1}$  in the low-frequency region, which can be assigned to  $\nu(\text{V}=\text{S})$  terminal S stretches.<sup>2</sup> In  $\text{WO}_3\text{-VS}_2$ , the corresponding terminal S stretch of  $\text{VS}_2$  was observed at 1020  $\text{cm}^{-1}$  which is slightly blue shifted compared to  $\text{VS}_2$ , which implies an interaction between the components in the composite.

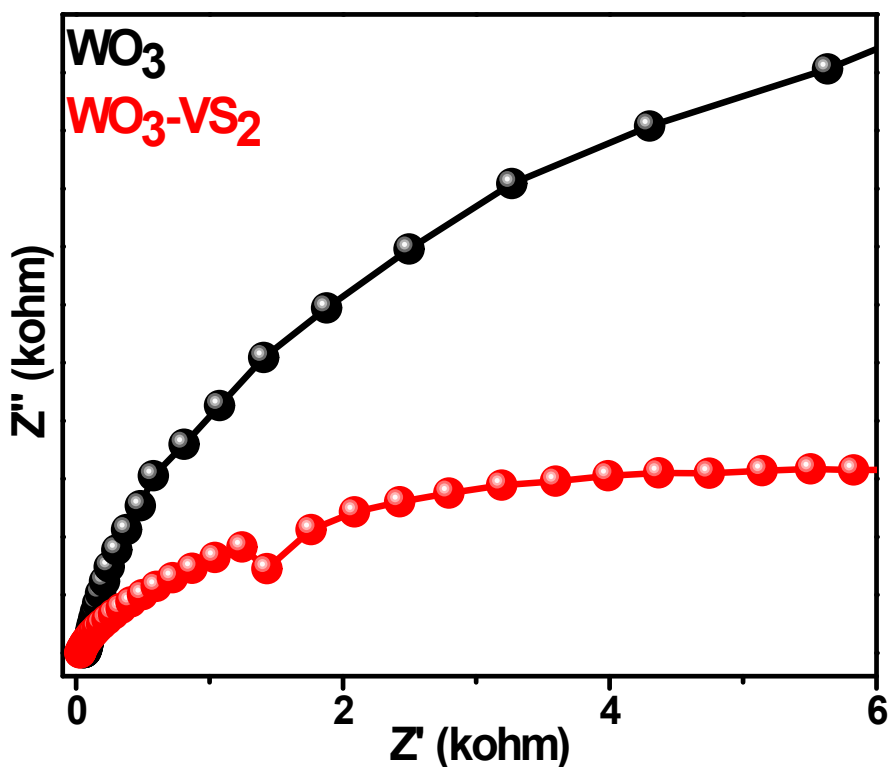

**Fig. S2** Nyquist plots of  $\text{WO}_3$  and  $\text{WO}_3\text{-VS}_2$  photoanode under light illumination in 0.1M  $\text{Na}_2\text{SO}_4$

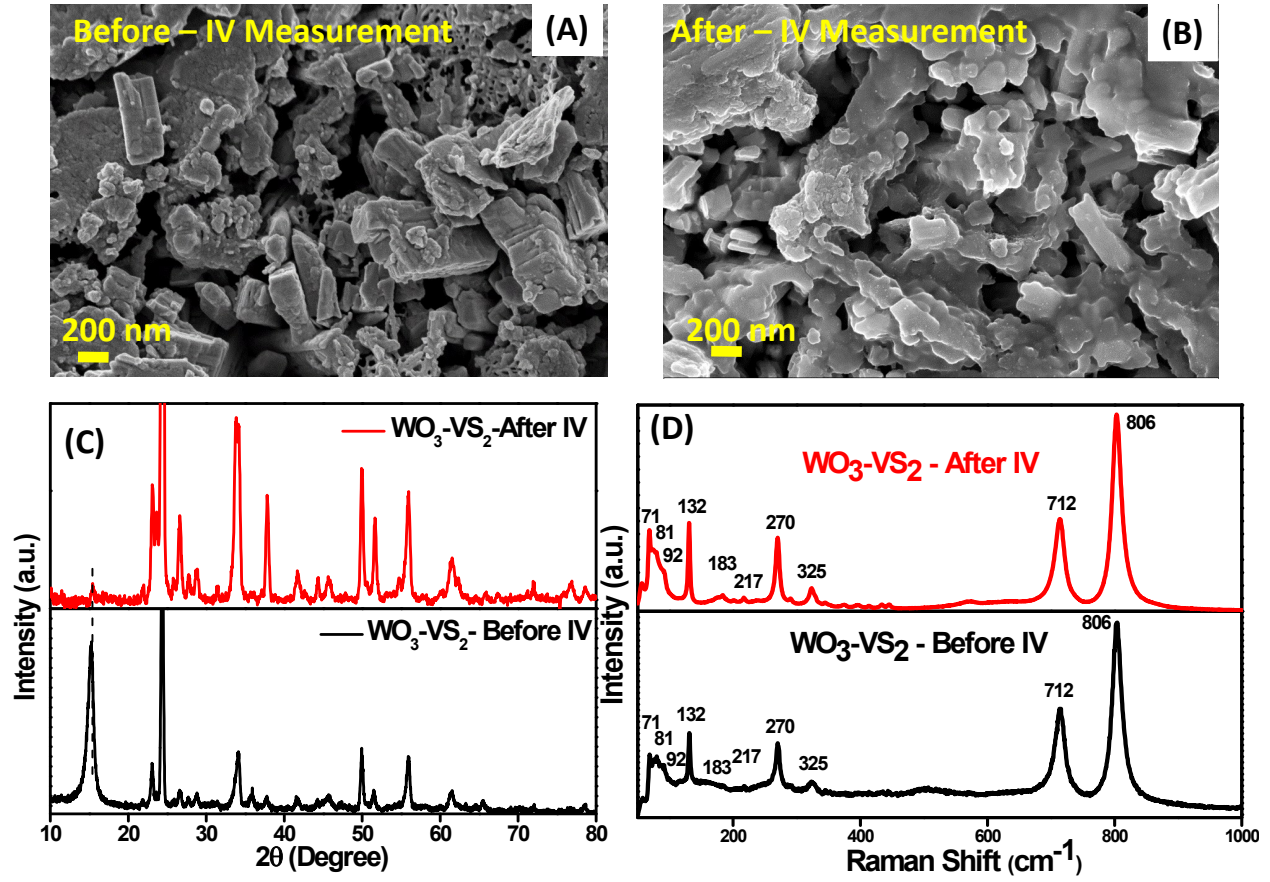

**Fig. S3.** (A) and (B) are FESEM image, (C) XRD and (D) Raman spectra of  $\text{WO}_3\text{-VS}_2$  composite before and after the PEC measurement.

The solar-to-hydrogen (STH) efficiency was calculated from the following formula.<sup>3,4</sup>

$$STH = \frac{J_{SC} \left( \frac{mA}{cm^2} \right) \times 1.23 V \times \eta_F}{P_{total} (mW/cm^2)}$$

Charge separation efficiency is calculated by using the following equation.<sup>5</sup>

$$\eta_{sep} = J_{sca} / J_{abs}$$

Where  $J_{\text{abs}}$  is the theoretical photo current density,  $J_{\text{sca}}$  is the photocurrent of the photoanode in the presence of scavengers as a function of applied bias.

**Table S1:** Tabulation of fitted parameters of Nyquist plot at open circuit potential.

|                                        | $R_s$ | $C_{\text{bulk}}$     | $R_{\text{trap}}(\text{bulk})$ | $R_{\text{ct trap}}$ | $C_{\text{trap}}$     |
|----------------------------------------|-------|-----------------------|--------------------------------|----------------------|-----------------------|
| WO <sub>3</sub> Dark                   | 61.29 | $1.02 \times 10^{-5}$ | $7.71 \times 10^5$             | $2.5 \times 10^4$    | $7.32 \times 10^{-6}$ |
| WO <sub>3</sub> Light                  | 65.71 | $1.02 \times 10^{-5}$ | $1.87 \times 10^4$             | $1.79 \times 10^4$   | $3.55 \times 10^{-5}$ |
| WO <sub>3</sub> -VS <sub>2</sub> Dark  | 32.36 | $1.15 \times 10^{-5}$ | $2.79 \times 10^3$             | 9073                 | $2.34 \times 10^{-5}$ |
| WO <sub>3</sub> -VS <sub>2</sub> Light | 32.44 | $1.20 \times 10^{-5}$ | $1.97 \times 10^3$             | 5504                 | $3.25 \times 10^{-5}$ |

## References

1. J. Wang, Z. Chen, G. Zhai and Y. Men, *Appl. Surf. Sci.* 2018, **462**, 760.
2. B. Pandit, L. K. Bommineedi and B. R. Sankapal, *J. Energy Chem.*, 2018, **0**, 1.
3. B. Pinaud, J. D. Benck, L. C. Seitz, A. J. Forman, Z. B. Chen, T. G. Deutsch, B. D. James, K. N. Baum, G. N. Baum, S. Ardo, H. L. Wang, E. Miller and T. F. Jaramillo, *Energy Environ. Sci.*, 2013, **6**, 1983.
4. Z. Chen, H. Dinh and E. Miller, *Photoelectrochemical Water Splitting*, Springer, 2013.
5. T. K. Sahu, A. K. Shah, A. Banik, M. Qureshi, *ACS Appl. Energy Mater.* 2019, **2**, 4325.
